# Supplementary material
Source: PubMed Central journal article supplement (PMC4576125)
Supplement: AAC.01447-15_zac010154405so1.pdf [file AAC.01447-15_zac010154405so1.pdf]

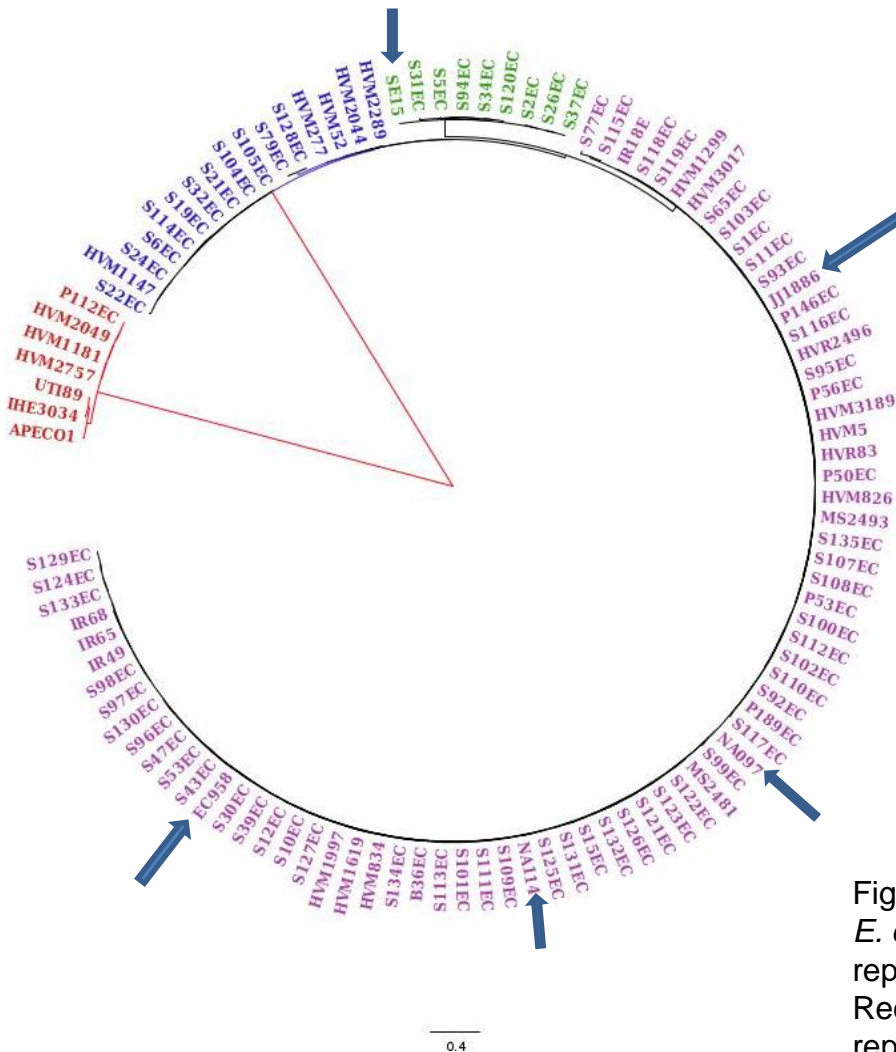

Fig. S1: Maximum Likelihood phylogenetic tree of 107 *E. coli* strains based on core genome SNPs. Green represents clade A, Blue clade B and Purple clade C. Red represents the outgroup members of ST95. Arrows represent the genomes that were used for BRIG analysis.

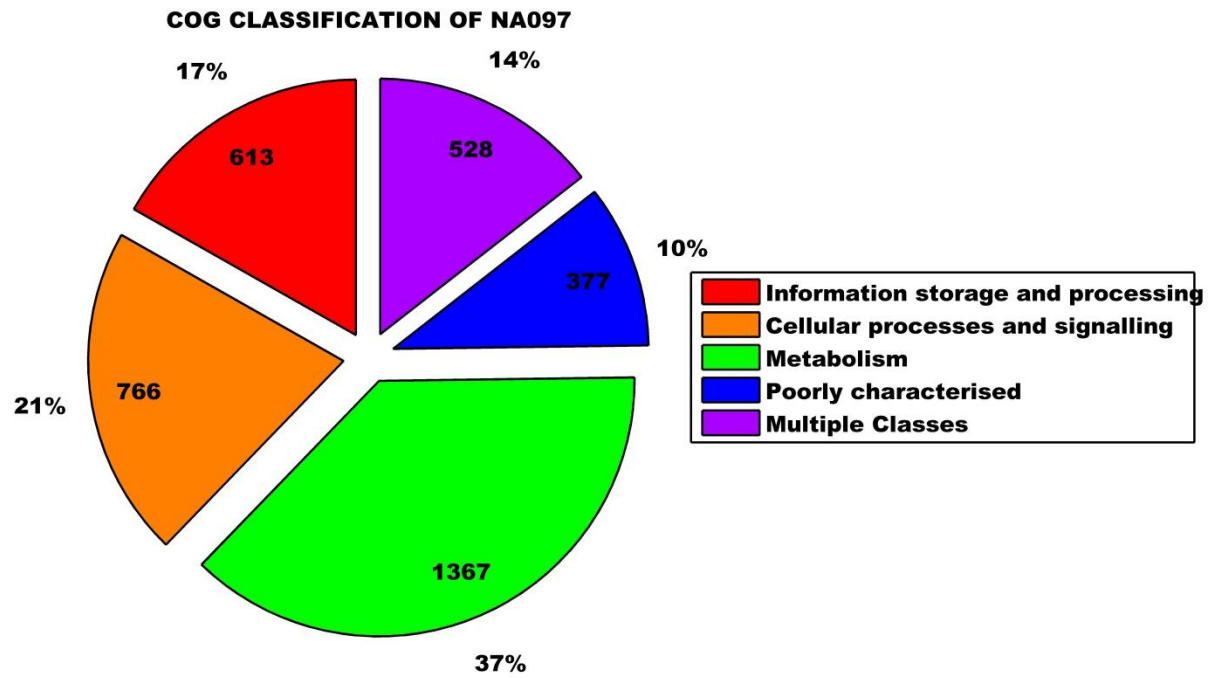

Fig. S2: COG functional classification of the annotated draft genome of NA097 from CDD database.

Table S1: Status table for UPEC specific virulence factors within the compared strains of ST131 *E. coli* as per the parameters described earlier.

| S. no | VF     | VFDB/ GenBank ID | EC958 | SE15 | NA097 | NA114 | JJ1886 |
|-------|--------|------------------|-------|------|-------|-------|--------|
| 1.    | fimB   | VFG0871          | -     | +    | -     | -     | -      |
| 2.    | draC   | VFG0944          | +     | -    | +     | -     | -      |
| 3.    | draB   | VFG0943          | +     | -    | +     | -     | -      |
| 4.    | draA   | VFG0942          | +     | -    | +     | -     | -      |
| 5.    | draP   | VFG0946          | +     | -    | +     | -     | -      |
| 6.    | draD   | VFG0945          | +     | -    | +     | -     | -      |
| 7.    | papF   | VFG0889          | -     | -    | -     | +     | -      |
| 8.    | papB   | VFG0881          | -     | -    | -     | +     | -      |
| 9.    | papD   | VFG0885          | -     | -    | -     | +     | -      |
| 10.   | papC   | VFG0884          | -     | -    | -     | +     | -      |
| 11.   | papG   | VFG0890          | -     | -    | -     | +     | -      |
| 12.   | papH   | VFG0883          | -     | -    | -     | +     | -      |
| 13.   | papK   | VFG0887          | -     | -    | -     | +     | -      |
| 14.   | papJ_2 | VFG0897          | -     | -    | -     | +     | -      |
| 15.   | TRAT1  | gi20095235       | +     | +    | +     | +     | +      |
| 16.   | entE   | VFG0932          | +     | +    | +     | +     | +      |
| 17.   | entB   | VFG0933          | +     | +    | +     | +     | +      |
| 18.   | chuT   | VFG0918          | +     | +    | +     | +     | +      |
| 19.   | entA   | VFG0934          | +     | +    | +     | +     | +      |
| 20.   | fimI   | VFG0874          | +     | +    | +     | +     | +      |
| 21.   | papI_2 | VFG0891          | +     | -    | +     | +     | +      |
| 22.   | chuS   | VFG0916          | +     | +    | +     | +     | +      |
| 23.   | entD   | VFG0929          | +     | +    | +     | +     | +      |
| 24.   | fepA   | VFG0923          | +     | +    | -     | +     | +      |
| 25.   | fimC   | VFG0875          | +     | +    | +     | +     | +      |
| 26.   | fepD   | VFG0926          | +     | +    | +     | +     | +      |
| 27.   | chuA   | VFG0917          | +     | +    | +     | +     | +      |
| 28.   | chuX   | VFG0920          | +     | +    | +     | +     | +      |
| 29.   | iutA   | VFG0936          | -     | -    | +     | +     | +      |
| 30.   | iucA   | VFG0940          | +     | -    | +     | +     | +      |
| 31.   | entC   | VFG0931          | +     | +    | +     | +     | +      |
| 32.   | fimA   | VFG0873          | +     | +    | +     | +     | +      |
| 33.   | ompA   | VFG1443          | +     | +    | +     | +     | +      |
| 34.   | fimE   | VFG0872          | +     | +    | +     | +     | +      |
| 35.   | kpsM   | VFG1450          | +     | +    | +     | +     | +      |
| 36.   | fimG   | VFG0878          | +     | +    | +     | +     | +      |
| 37.   | ibeB   | VFG1441          | +     | +    | +     | +     | +      |
| 38.   | sat    | VFG0902          | +     | -    | +     | +     | +      |

|     |      |           |   |   |   |   |   |
|-----|------|-----------|---|---|---|---|---|
| 39. | aslA | VFG1444   | + | + | + | + | + |
| 40. | iucD | VFG0937   | + | - | + | + | + |
| 41. | kpsD | VFG1448   | + | + | + | + | + |
| 42. | fimF | VFG0877   | + | + | + | + | + |
| 43. | iucC | VFG0938   | + | - | + | + | + |
| 44. | ibeC | VFG1440   | + | + | + | + | + |
| 45. | fimD | VFG0876   | + | + | + | + | + |
| 46. | iucB | VFG0939   | + | - | + | + | + |
| 47. | Usp  | gi7416048 | + | + | + | + | + |
| 48. | traJ | VFG1445   | + | + | + | + | + |
| 49. | fimH | VFG0879   | + | + | + | + | + |
| 50. | chuY | VFG0921   | + | + | + | + | + |
| 51. | entF | VFG0930   | + | + | + | + | + |
| 52. | fepC | VFG0925   | + | + | + | + | + |
| 53. | chuU | VFG0922   | + | + | + | + | + |
| 54. | fepB | VFG0924   | + | + | + | + | + |
| 55. | chuW | VFG0919   | + | + | + | + | + |

Table S2: Status table of resistance associated genes as obtained from ARDB based on parameters as mentioned above within the compared strains

|     | Resistance    | Resistance class | EC958 | SE15 | NA097 | NA114 | JJ1886 |
|-----|---------------|------------------|-------|------|-------|-------|--------|
| 1.  | blaCTXM-15    | Beta lactam      | +     | -    | +     | +     | +      |
| 2.  | BlaTEM-1.     | Beta lactam      | +     | -    | +     | -     | +      |
| 3.  | OXA-1         | Beta lactam      | +     | -    | +     | +     | +      |
| 4.  | CMY-23        | Beta lactam      | +     | -    | -     | -     | -      |
| 5.  | AadA4         | Aminoglycoside   | +     | -    | +     | +     | -      |
| 6.  | AAC(6')-Ib-cr | Fluoroquinolones | +     | -    | +     | +     | +      |
| 7.  | AAC(3)-IIc    | Aminoglycoside   | -     | -    | +     | -     | -      |
| 8.  | acrD          | Eflux            | +     | +    | +     | +     | +      |
| 9.  | acrA.         | Eflux            | +     | +    | +     | +     | +      |
| 10. | acrF          | Eflux            | +     | +    | +     | +     | +      |
| 11. | acrB          | Eflux            | +     | +    | +     | +     | +      |
| 12. | acrE          | Eflux            | +     | +    | +     | +     | +      |
| 13. | APH(6)-Id     | Aminoglycoside   | -     | -    | +     | -     | -      |
| 14. | APH(3'')-Ib   | Aminoglycoside   | +     | +    | +     | +     | +      |
| 15. | StrA          | Streptomycin     | -     | -    | +     | -     | -      |
| 16. | sul2          | Sulphonamides    | -     | -    | +     | -     | -      |
| 17. | Sul1          | Sulphonamides    | +     | -    | +     | +     | -      |
| 18. | dfrA17        | trimethoprim     | +     | -    | +     | +     | -      |
| 19. | catB2         | Phenolics        | -     | -    | +     | -     | -      |
| 20. | tetC*         | Tetracyclines    | +     | -    | +     | +     | -      |
| 21. | mdtK          | MDR efflux       | +     | +    | +     | +     | +      |
| 22. | mdtH          | MDR efflux       | +     | +    | +     | +     | +      |
| 23. | mdtF          | MDR efflux       | +     | +    | +     | +     | +      |
| 24. | mdtB          | MDR efflux       | +     | +    | +     | +     | +      |
| 25. | mdtD          | MDR efflux       | +     | +    | +     | +     | +      |
| 26. | mdtG          | MDR efflux       | +     | +    | +     | +     | +      |
| 27. | mdtL          | MDR efflux       | +     | +    | +     | +     | +      |

|     |                      |                                  |   |   |   |   |   |
|-----|----------------------|----------------------------------|---|---|---|---|---|
| 28. | mdtA                 | MDR efflux                       | + | + | + | + | + |
| 29. | mdtE                 | MDR efflux                       | + | + | + | + | + |
| 30. | mdtC                 | MDR efflux                       | + | + | + | + | + |
| 31. | emrA                 | MDR efflux                       | + | + | + | + | + |
| 32. | emrY                 | MDR efflux                       | + | + | + | - | + |
| 33. | emrK                 | MDR efflux                       | + | + | + | + | + |
| 34. | emrD                 | MDR efflux                       | + | + | + | + | + |
| 35. | asmA                 | Bile resistance                  | + | + | + | + | + |
| 36. | ompF                 | MDR                              | + | + | + | + | + |
| 37. | ECs3903              | Fluoroquinolones                 | + | + | + | + | + |
| 38. | ECs2138              | MAR regulator                    | + | + | + | + | + |
| 39. | ECs1739              | Polymixin B/aminoglycoside/EDTA  | + | + | + | + | + |
| 40. | ECs5045              | Drug induced oxidative stress    | + | + | + | + | + |
| 41. | ECs5044              | Drug induced oxidative stress    | + | + | + | + | + |
| 42. | parE                 | Fluoroquinolones                 | + | + | + | + | + |
| 43. | PhoQ                 | Antimicrobial Peptide resistance | + | + | + | + | + |
| 44. | EvgA                 | Acid                             | + | + | + | + | + |
| 45. | cpxA                 | Drug induced oxidative stress    | + | + | + | + | + |
| 46. | rpoB                 | Rifamycin                        | + | + | + | + | + |
| 47. | folP                 | Sulphonamides                    | + | + | + | + | + |
| 48. | tolC                 | MDR efflux                       | + | + | + | + | + |
| 49. | elongation factor Tu | Kirromycin                       | - | + | + | + | + |
| 50. | gyrA                 | Fluoroquinolones                 | + | + | + | + | + |
| 51. | EnvR                 | acrAB repressor                  | + | + | + | + | + |
| 52. | envZ                 | MDR                              | + | + | + | + | + |
| 53. | uppP                 | Bacitracin                       | + | + | + | + | + |
| 54. | yjiO                 | MDR                              | + | + | + | + | + |
| 55. | rpoB                 | Rifamycin                        | + | + | + | + | + |
| 56. | yfbG                 | polymyxin                        | - | + | + | + | + |

|     |                                |                               |   |   |   |   |   |
|-----|--------------------------------|-------------------------------|---|---|---|---|---|
| 57. | EvgA                           | Acid                          | + | + | + | + | + |
| 58. | gadX                           | Acid                          | + | + | + | + | + |
| 59. | mph(A) protein                 | Macrolide                     | + | - | + | + | - |
| 60. | CRP                            | MDR                           | + | + | + | + | + |
| 61. | Multidrug resistance protein B | Multi drug resistance         | + | + | + | + | + |
| 62. | RobA                           | Multi drug resistance         | + | + | + | + | + |
| 63. | MdfA                           | Multi drug resistance         | + | + | + | + | + |
| 64. | CpxR                           | Drug induced oxidative stress | + | + | + | + | + |
| 65. | mcrB                           | Bacteriophage resistance      | + | + | + | + | + |
| 66. | DLP12                          | MDR                           | + | + | + | + | + |
| 67. | baeR. Sensor BaeS              | Multi drug exporter           | + | + | + | + | + |
